# Supplementary material for: Quantitative GIS Model for Evaluating the Favorability of Alfalfa (Medicago sativa L.) Culture for Suitable Varieties in Romania: Case Study Bihor County
Source: MDPI journal article supplement (doi:10.3390/app11094205), 2021-05-05
Supplement: s1 [file s1]

*Supplimmentarry File 1. Potential Amount of Alfalfa in Green Mass at ATU Level*

| <i>Variety</i>   | <i>Potential Amount of Alfalfa - Green Mass/Plots of Good Favorability Class [kg]</i> |          |         |          |         |          |          |         |
|------------------|---------------------------------------------------------------------------------------|----------|---------|----------|---------|----------|----------|---------|
|                  | Magnat                                                                                | Daniel a | Sandr a | Carinc a | Roxan a | Mihael a | Teodor a | Cezar a |
| A.T.U            |                                                                                       |          |         |          |         |          |          |         |
| ABRAM            | 56522                                                                                 | 90439    | 90439   | 92493    | 92493   | 95576    | 18500    | 96603   |
| ABRĂMUȚ          | 55655                                                                                 | 89059    | 89059   | 91091    | 91091   | 94118    | 18224    | 95127   |
| AVRAM IANCU      | 79642                                                                                 | 127429   | 127429  | 130325   | 28894   | 29856    | 26065    | 30177   |
| BALC             | 35203                                                                                 | 56326    | 56326   | 57608    | 57608   | 59528    | 11523    | 60166   |
| BATĂR            | 8580                                                                                  | 13727    | 13727   | 14039    | 14039   | 14507    | 2808     | 14663   |
| BIHARIA          | 148767                                                                                | 238032   | 9558    | 243442   | 9776    | 10102    | 48687    | 10209   |
| BOIANU MARE      | 1623                                                                                  | 2597     | 2597    | 2656     | 2656    | 2745     | 531      | 2774    |
| BORȘ             | 86392                                                                                 | 138227   | 27009   | 141368   | 27623   | 28544    | 28274    | 28850   |
| BRUSTURI         | 42683                                                                                 | 68295    | 68295   | 69847    | 69847   | 72175    | 13970    | 72950   |
| BUDUSLĂU         | 97413                                                                                 | 155859   | 35792   | 159404   | 36608   | 37827    | 31880    | 38234   |
| CĂPÂLNA          | 73886                                                                                 | 118221   | 395     | 120907   | 404     | 415      | 24184    | 420     |
| CEFA             | 108179                                                                                | 173085   | 44801   | 177020   | 45820   | 47346    | 35404    | 47856   |
| CEICA            | 10244                                                                                 | 16391    | 16391   | 16763    | 16763   | 17321    | 3353     | 17508   |
| CETARIU          | 69176                                                                                 | 110685   | 110685  | 113201   | 11023   | 11390    | 22642    | 11509   |
| CHERECHIU        | 49122                                                                                 | 78601    | 78601   | 80386    | 80386   | 83064    | 16078    | 83959   |
| CHIȘLAZ          | 26494                                                                                 | 224066   | 42394   | 229161   | 43360   | 44802    | 45833    | 45281   |
| COCIUBA MARE     | 48037                                                                                 | 76861    | 76861   | 78607    | 78607   | 81228    | 15722    | 82101   |
| DERNA            | 13708                                                                                 | 21933    | 21933   | 22432    | 22432   | 23178    | 4487     | 23428   |
| DIOSIG           | 98653                                                                                 | 500352   | 52005   | 511727   | 53190   | 54962    | 102348   | 55551   |
| DOBREȘTI         | 1707                                                                                  | 2732     | 2732    | 2794     | 2794    | 2887     | 559      | 2916    |
| GEPIU            | 0                                                                                     | 307883   | 0       | 314880   | 0       | 0        | 62976    | 0       |
| GIRIȘU DE CRIȘ   | 6527                                                                                  | 296671   | 10443   | 303413   | 10680   | 11036    | 60683    | 11154   |
| HIDIȘELU DE SUS  | 0                                                                                     | 0        | 0       | 0        | 0       | 0        | 0        | 0       |
| HOLOD            | 70407                                                                                 | 112655   | 1021    | 115215   | 1044    | 1079     | 23042    | 1091    |
| HUSASĂU DE TINCA | 65293                                                                                 | 104472   | 104472  | 106849   | 106849  | 110410   | 21372    | 111596  |
| INEU             | 39385                                                                                 | 63017    | 63017   | 64449    | 64449   | 66598    | 12889    | 67313   |
| LĂZĂRENI         | 3                                                                                     | 5        | 5       | 5        | 5       | 5        | 1        | 6       |
| MĂDĂRAS          | 168436                                                                                | 269498   | 153334  | 275624   | 156820  | 162047   | 55126    | 163790  |
| MARCA            | 49                                                                                    | 78       | 78      | 80       | 80      | 83       | 16       | 84      |
| MARGHITA         | 53516                                                                                 | 85631    | 85631   | 87577    | 87577   | 90496    | 17517    | 91467   |
| MIȘCA            | 534                                                                                   | 855      | 855     | 875      | 875     | 904      | 175      | 913     |
| NOJORID          | 21331                                                                                 | 505859   | 34135   | 517357   | 34912   | 36072    | 103472   | 36460   |
| OLCEA            | 15970                                                                                 | 25554    | 25554   | 26136    | 26136   | 27006    | 5227     | 27298   |
| ORADEA           | 10398                                                                                 | 667195   | 16640   | 682359   | 17019   | 17585    | 3405     | 17774   |
| OȘORHEI          | 41319                                                                                 | 66109    | 66109   | 67612    | 67612   | 69865    | 13522    | 70616   |
| PALEU            | 22662                                                                                 | 36266    | 36266   | 37093    | 37093   | 38327    | 7421     | 38742   |

| PIR                   | 1      | 1      | 1      | 1      | 1      | 1      | 0      | 1      |
|-----------------------|--------|--------|--------|--------|--------|--------|--------|--------|
| POMEZEU               | 3077   | 4926   | 4926   | 5038   | 5038   | 5205   | 1008   | 5259   |
| RĂBĂGANI              | 15258  | 24416  | 24416  | 24972  | 24972  | 25802  | 4996   | 26081  |
| ROȘIORI               | 124721 | 199555 | 199555 | 204090 | 204090 | 110513 | 40819  | 111700 |
| SĂCĂDAT               | 1587   | 2540   | 2540   | 2597   | 2597   | 2685   | 519    | 2713   |
| SĂCUENI               | 229907 | 367880 | 367880 | 376252 | 376252 | 388783 | 75264  | 392963 |
| SĂLACEA               | 4437   | 207032 | 7105   | 211736 | 7265   | 7506   | 42349  | 7587   |
| SĂLARD                | 46399  | 276643 | 74241  | 282931 | 75929  | 78461  | 56586  | 79304  |
| SALONTA               | 23748  | 37998  | 37998  | 38861  | 38861  | 40156  | 7772   | 40588  |
| SÂMBĂȚA               | 35536  | 56859  | 56859  | 58152  | 58152  | 60090  | 11629  | 60736  |
| SÂNIOB                | 72521  | 116044 | 116044 | 118680 | 118680 | 122636 | 23739  | 123951 |
| SÂNMARTIN             | 7537   | 12060  | 12060  | 12334  | 12334  | 12746  | 2468   | 12883  |
| SÂNNICOLAU ROMÂN      | 187    | 399383 | 300    | 408460 | 307    | 317    | 81692  | 320    |
| SÂNTANDREI            | 0      | 229111 | 0      | 234318 | 0      | 0      | 46864  | 0      |
| SÂRBI                 | 94354  | 150971 | 794    | 154400 | 810    | 836    | 30882  | 847    |
| ȘIMIAN                | 86602  | 357431 | 35062  | 365554 | 35858  | 37053  | 73111  | 37451  |
| ȘOIMI                 | 11694  | 18711  | 18711  | 19136  | 19136  | 19775  | 3828   | 19987  |
| SPINUȘ                | 63536  | 101660 | 344    | 103969 | 351    | 362    | 20794  | 365    |
| SUPLACU DE BARCĂU     | 824    | 1318   | 1318   | 1348   | 1348   | 1393   | 269    | 1408   |
| TĂMĂȘEU               | 43972  | 70355  | 70355  | 71954  | 71954  | 74351  | 14391  | 75151  |
| TARCEA                | 82311  | 131702 | 16789  | 134693 | 17169  | 17741  | 26939  | 17932  |
| TĂUTEU                | 21953  | 35125  | 35125  | 35922  | 35922  | 37120  | 7184   | 37518  |
| TINCA                 | 170323 | 272513 | 135387 | 278708 | 138465 | 143081 | 55742  | 144619 |
| TOBOLIU               | 95191  | 152305 | 9387   | 155766 | 9600   | 9920   | 31153  | 10026  |
| TULCA                 | 3207   | 5132   | 5132   | 5248   | 5248   | 5423   | 1050   | 5482   |
| UILEACU DE BEIUȘ      | 62     | 98     | 98     | 100    | 100    | 104    | 20     | 105    |
| VALEA LUI MIHAI       | 81852  | 130962 | 1323   | 133939 | 1353   | 1398   | 26788  | 1414   |
| VIIȘOARA              | 10856  | 17369  | 17369  | 17763  | 17763  | 18355  | 3553   | 18553  |
| ZERIND                | 2446   | 3913   | 3913   | 4002   | 4002   | 4136   | 800    | 4180   |
| Green Mass Production | 296169 | 822881 | 281975 | 841585 | 268025 | 266917 | 155015 | 269785 |
|                       | 7      | 0      | 3      | 3      | 6      | 2      | 2      | 0      |

*Supplimentarry File 2. Potential Amount of Alfalfa in Dry Mass at ATU Level*

| Variety     | Potential Amount of Alfalfa - Dry Mass/Plots of Good Favorability<br>Class [kg] |         |        |        |        |        |         |         |
|-------------|---------------------------------------------------------------------------------|---------|--------|--------|--------|--------|---------|---------|
|             | Magnat                                                                          | Daniela | Sandra | Carina | Roxana | Cezara | Teodora | Mihaila |
| T.A.B.      |                                                                                 |         |        |        |        |        |         |         |
| ABRAM       | 17471                                                                           | 18500   | 18500  | 18500  | 18500  | 19527  | 97630   | 95576   |
| ABRĂMUȚ     | 17204                                                                           | 18224   | 18224  | 18224  | 18224  | 19233  | 96140   | 94118   |
| AVRAM IANCU | 24617                                                                           | 26065   | 26065  | 26065  | 26065  | 27513  | 30499   | 29856   |
| BALC        | 10882                                                                           | 11523   | 11523  | 11523  | 11523  | 12162  | 60807   | 59528   |

|                     |       |        |        |        |        |        |        |        |
|---------------------|-------|--------|--------|--------|--------|--------|--------|--------|
| BATĂR               | 2652  | 2808   | 2808   | 2808   | 2808   | 2964   | 14819  | 14507  |
| BIHARIA             | 45983 | 48687  | 48687  | 48687  | 48687  | 51393  | 10318  | 10102  |
| BOIANU MARE         | 502   | 531    | 531    | 531    | 531    | 561    | 2804   | 2745   |
| BORȘ                | 26703 | 28274  | 28274  | 28274  | 28274  | 29845  | 29158  | 28544  |
| BRUSTURI            | 13194 | 13970  | 13970  | 13970  | 13970  | 14746  | 73726  | 72175  |
| BUDUSLĂU            | 30108 | 31880  | 31880  | 31880  | 31880  | 33651  | 38640  | 37827  |
| CĂPÂLNA             | 22838 | 24184  | 24184  | 24184  | 24184  | 25527  | 424    | 415    |
| CEFA                | 33436 | 35404  | 35404  | 35404  | 35404  | 37371  | 48365  | 47346  |
| CEICA               | 3166  | 3353   | 3353   | 3353   | 3353   | 3540   | 17695  | 17321  |
| CETARIU             | 21380 | 22642  | 22642  | 22642  | 22642  | 23902  | 11634  | 11390  |
| CHERECHIU           | 15186 | 16078  | 16078  | 16078  | 16078  | 16973  | 84850  | 83064  |
| CHIȘLAZ             | 43288 | 45833  | 45833  | 45833  | 45833  | 48380  | 45767  | 44802  |
| COCIUBA MARE        | 14848 | 15722  | 15722  | 15722  | 15722  | 16595  | 82975  | 81228  |
| DERNA               | 4237  | 4487   | 4487   | 4487   | 4487   | 4735   | 23677  | 23178  |
| DIOSIG              | 96659 | 102348 | 102348 | 102348 | 102348 | 108030 | 56143  | 54962  |
| DOBREȘTI            | 528   | 559    | 559    | 559    | 559    | 590    | 2948   | 2887   |
| GEPIU               | 59477 | 62976  | 62976  | 62976  | 62976  | 66475  | 0      | 0      |
| GIRIȘU DE CRIȘ      | 57311 | 60683  | 60683  | 60683  | 60683  | 64054  | 11273  | 11036  |
| HIDIȘELU DE SUS     | 0     | 0      | 0      | 0      | 0      | 0      | 0      | 0      |
| HOLOD               | 21763 | 23042  | 23042  | 23042  | 23042  | 24324  | 1103   | 1079   |
| HUSASĂU DE<br>TINCA | 20184 | 21372  | 21372  | 21372  | 21372  | 22558  | 112783 | 110410 |
| INEU                | 12173 | 12889  | 12889  | 12889  | 12889  | 13607  | 68029  | 66598  |
| LĂZĂRENI            | 1     | 1      | 1      | 1      | 1      | 1      | 6      | 5      |
| MĂDĂRAS             | 52062 | 55126  | 55126  | 55126  | 55126  | 58187  | 165532 | 162047 |
| MARCA               | 15    | 16     | 16     | 16     | 16     | 17     | 85     | 83     |
| MARGHITA            | 16543 | 17517  | 17517  | 17517  | 17517  | 18489  | 92442  | 90496  |
| MIȘCA               | 165   | 175    | 175    | 175    | 175    | 185    | 923    | 904    |
| NOJORID             | 97722 | 103472 | 103472 | 103472 | 103472 | 7370   | 36847  | 36072  |
| OLCEA               | 4937  | 5227   | 5227   | 5227   | 5227   | 5518   | 27586  | 27006  |
| ORADEA              | 3216  | 3405   | 3405   | 3405   | 3405   | 3595   | 17963  | 17585  |
| OȘORHEI             | 12771 | 13522  | 13522  | 13522  | 13522  | 14274  | 71368  | 69865  |
| PALEU               | 7008  | 7421   | 7421   | 7421   | 7421   | 7832   | 39150  | 38327  |
| PIR                 | 0     | 0      | 0      | 0      | 0      | 0      | 1      | 1      |
| POMEZEU             | 953   | 1008   | 1008   | 1008   | 1008   | 1064   | 5317   | 5205   |
| RĂBĂGANI            | 4718  | 4996   | 4996   | 4996   | 4996   | 5273   | 26358  | 25802  |
| ROȘIORI             | 38551 | 40819  | 40819  | 40819  | 40819  | 43087  | 112888 | 110513 |
| SĂCĂDAT             | 491   | 519    | 519    | 519    | 519    | 549    | 2743   | 2685   |
| SĂCUENI             | 71072 | 75264  | 75264  | 75264  | 75264  | 79432  | 397136 | 388783 |
| SĂLACEA             | 39995 | 42349  | 42349  | 42349  | 42349  | 44701  | 7667   | 7506   |
| SĂLARD              | 53442 | 56586  | 56586  | 56586  | 56586  | 59730  | 80144  | 78461  |
| SALONTA             | 7341  | 7772   | 7772   | 7772   | 7772   | 8204   | 41021  | 40156  |

|                      |               |               |               |               |               |               |               |               |
|----------------------|---------------|---------------|---------------|---------------|---------------|---------------|---------------|---------------|
| SÂMBĂȚA              | 10984         | 11629         | 11629         | 11629         | 11629         | 12276         | 61382         | 60090         |
| SÂNIOB               | 22419         | 23739         | 23739         | 23739         | 23739         | 25059         | 125271        | 122636        |
| SÂNMARTIN            | 2330          | 2468          | 2468          | 2468          | 2468          | 2604          | 13019         | 12746         |
| SÂNNICOLAU<br>ROMÂN  | 77154         | 81692         | 81692         | 81692         | 81692         | 86231         | 324           | 317           |
| SÂNTANDREI           | 44260         | 46864         | 46864         | 46864         | 46864         | 49467         | 0             | 0             |
| SÂRBI                | 29167         | 30882         | 30882         | 30882         | 30882         | 32598         | 854           | 836           |
| ȘIMIAN               | 69048         | 73111         | 73111         | 73111         | 73111         | 77173         | 37849         | 37053         |
| ȘOIMI                | 3615          | 3828          | 3828          | 3828          | 3828          | 4040          | 20200         | 19775         |
| SPINUȘ               | 19639         | 20794         | 20794         | 20794         | 20794         | 21950         | 370           | 362           |
| SUPLACU DE<br>BARCĂU | 254           | 269           | 269           | 269           | 269           | 285           | 1423          | 1393          |
| TĂMĂȘEU              | 13591         | 14391         | 14391         | 14391         | 14391         | 15191         | 75951         | 74351         |
| TARCEA               | 25443         | 26939         | 26939         | 26939         | 26939         | 28436         | 18123         | 17741         |
| TĂUTEU               | 6785          | 7184          | 7184          | 7184          | 7184          | 7583          | 37919         | 37120         |
| TINCA                | 52643         | 55742         | 55742         | 55742         | 55742         | 58837         | 146158        | 143081        |
| TOBOLIU              | 29422         | 31153         | 31153         | 31153         | 31153         | 32884         | 10134         | 9920          |
| TULCA                | 991           | 1050          | 1050          | 1050          | 1050          | 1108          | 5540          | 5423          |
| UILEACU DE BEIUȘ     | 19            | 20            | 20            | 20            | 20            | 21            | 106           | 104           |
| VALEA LUI MIHAI      | 25299         | 26788         | 26788         | 26788         | 26788         | 28276         | 1428          | 1398          |
| VIIȘOARA             | 3354          | 3553          | 3553          | 3553          | 3553          | 3750          | 18750         | 18355         |
| ZERIND               | 756           | 800           | 800           | 800           | 800           | 845           | 4225          | 4136          |
| <b>Green Mass</b>    | <b>146399</b> | <b>155015</b> | <b>155015</b> | <b>155015</b> | <b>155015</b> | <b>153440</b> | <b>272655</b> | <b>266917</b> |
| <b>Production</b>    | <b>1</b>      | <b>2</b>      | <b>2</b>      | <b>2</b>      | <b>2</b>      | <b>7</b>      | <b>2</b>      | <b>2</b>      |
